# Supplementary material for: Electronic modulation of CoP nanosheets array by Zn doping as an efficient electrocatalyst for overall water splitting
Source: Royal Society of Chemistry journal article supplement (doi:10.1039/d3cy00833a), 2023-01-01
Supplement: d3cy00833a1.pdf [file d3cy00833a1.pdf]

Supporting Information (SI):

**Electronic modulation of CoP nanosheets array by Zn doping as  
efficient electrocatalysts for overall water splitting**

Xiaoyi Li<sup>a</sup>, Jianfeng Huang<sup>\*a</sup>, Zixuan Liu<sup>b</sup>, Qian Chen<sup>a</sup>, Guanjun Chen<sup>a</sup>, Yifei Zhang<sup>a</sup>,

Koji Kajiyoshi<sup>c</sup>, Yong Zhao<sup>d</sup>, Yijun Liu<sup>d</sup>, Liyun Cao<sup>\*a</sup> and Liangliang Feng<sup>\*a</sup>

<sup>a</sup> School of Material Science and Engineering, International S&T Cooperation Foundation of Shaanxi Province, Shaanxi University of Science and Technology, Xi'an 710021, China

<sup>b</sup> Faculty of Engineering, University of Nottingham, University Park, Nottingham NG7 2RD, UK

<sup>c</sup> Kochi University, Research Laboratory of Hydrothermal Chemistry, Kochi 780-8520, Japan

<sup>d</sup> Guangdong Mona Lisa Group Co. Ltd., Foshan, Guangdong 528211, China

\* Corresponding authors

E-mail: huangjf@sust.edu.cn; fengll@sust.edu.cn; caoliyun@sust.edu.cn

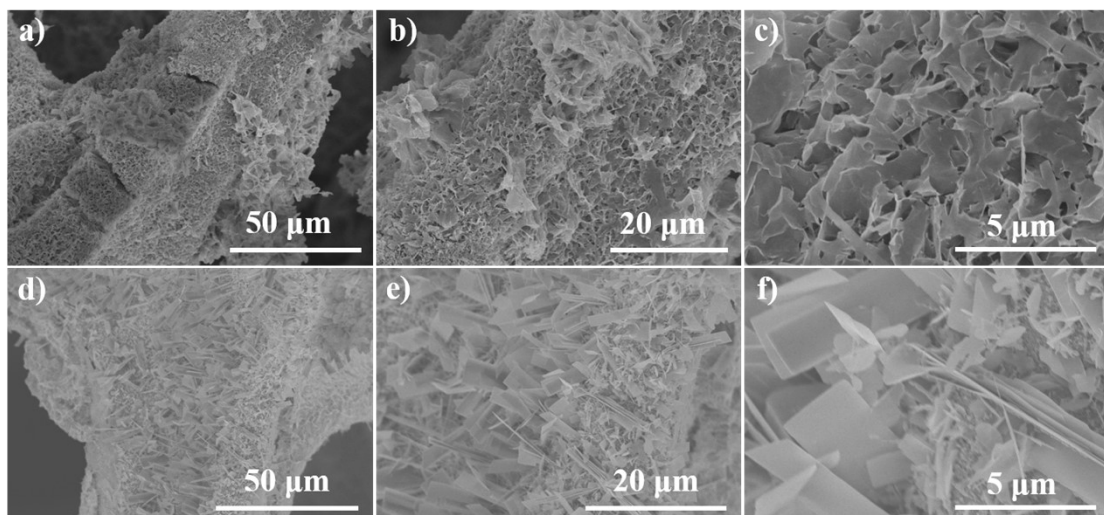

**Fig. S1** SEM images of (a-c) CoZn(OH)<sub>x</sub>/CF and (d-f) Co(OH)<sub>x</sub>/CF.

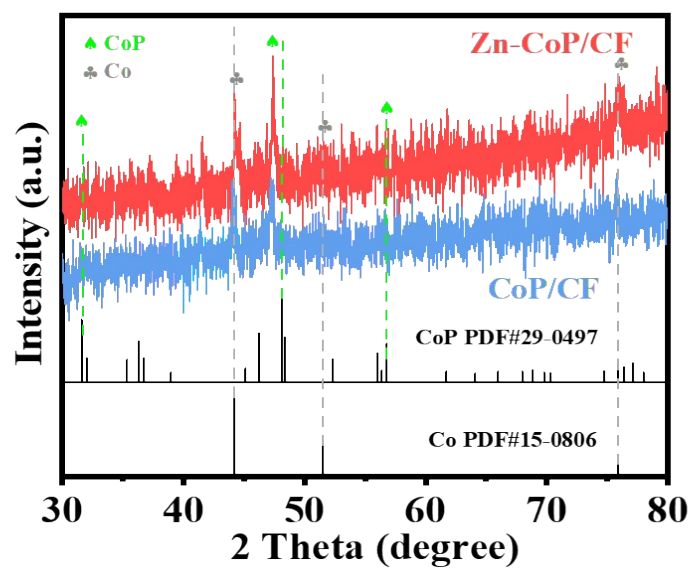

Fig. S2 XRD pattern of Zn-CoP/CF and CoP/CF.

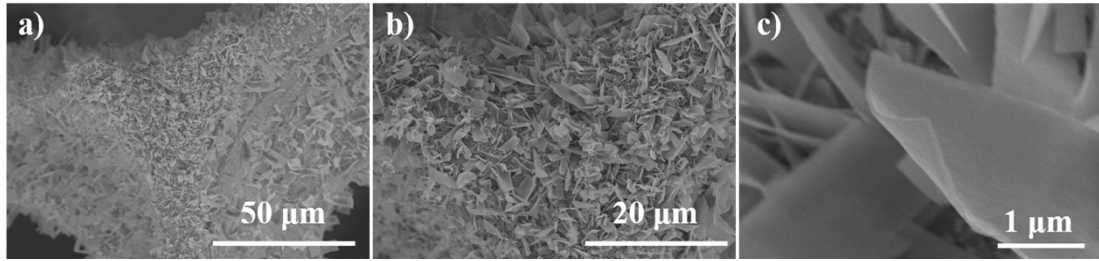

**Fig. S3** SEM images of (a-c) CoP/CF.

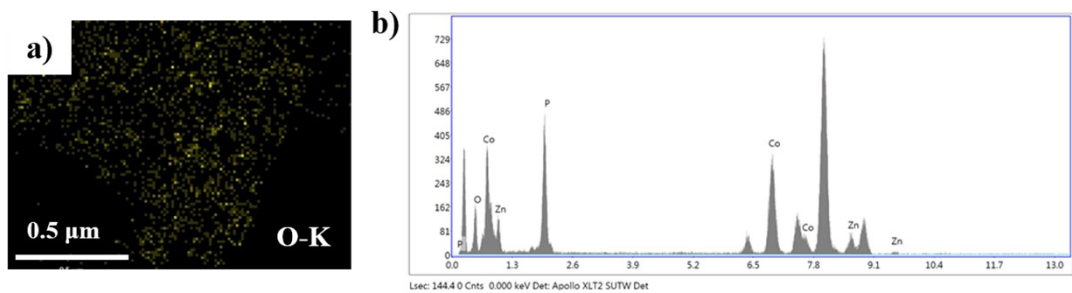

**c)**

| Element | Weight % | Atomic % | Net Int. | Error % | Kratio |
|---------|----------|----------|----------|---------|--------|
| O K     | 59.58    | 75.59    | 14.7     | 9.78    | 0.21   |
| P K     | 33.95    | 22.25    | 56.6     | 7.30    | 0.14   |
| Co K    | 4.57     | 1.58     | 70.7     | 1.63    | 0.04   |
| Zn K    | 1.90     | 0.59     | 36.3     | 3.03    | 0.02   |

**Fig. S4** (a) EDX element mapping of O element in Scanning TEM image of Zn-CoP/CF; (b-c) EDX results of Zn-CoP/CF.

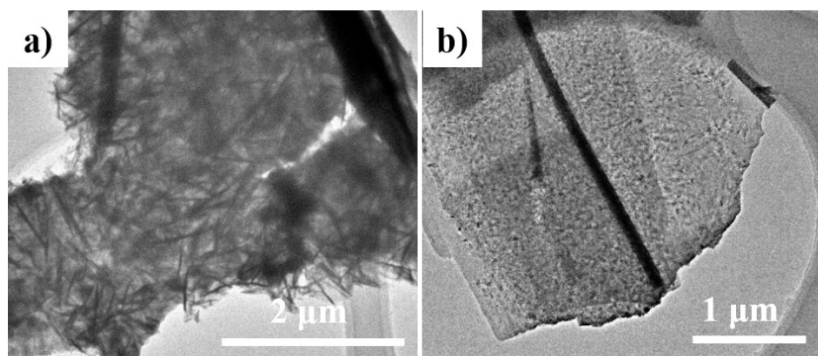

**Fig. S5** (a-b) TEM images at different magnifications of CoP/CF.

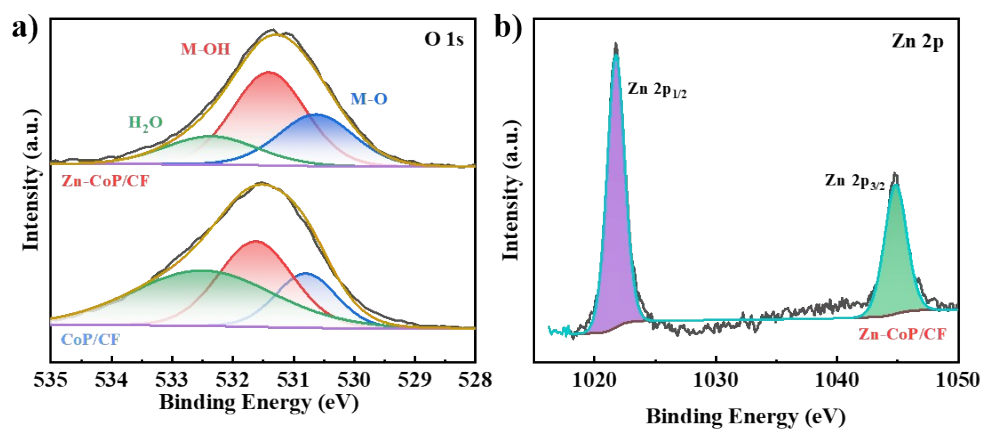

**Fig. S6** (a) High-resolution XPS spectra of O 1s of Zn-CoP/CF and CoP/CF. (b) High-resolution XPS spectra of Zn 2p of Zn-CoP/CF.

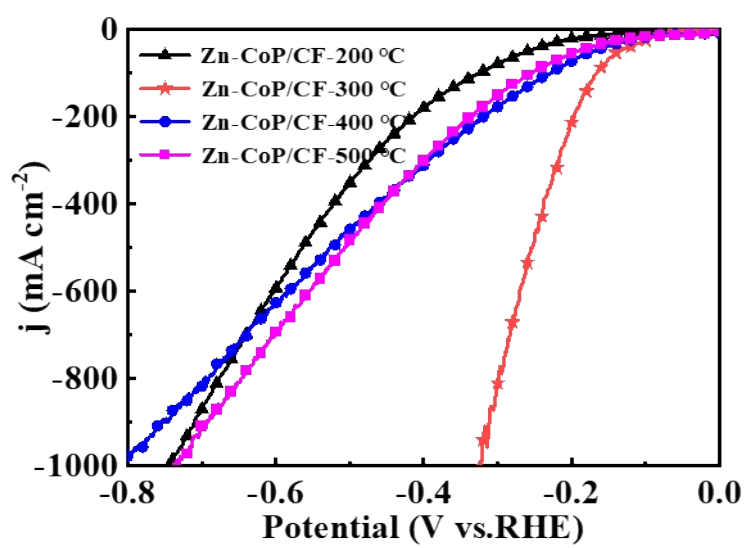

**Fig. S7** Polarization curves for HER of catalysts at different phosphating temperatures.



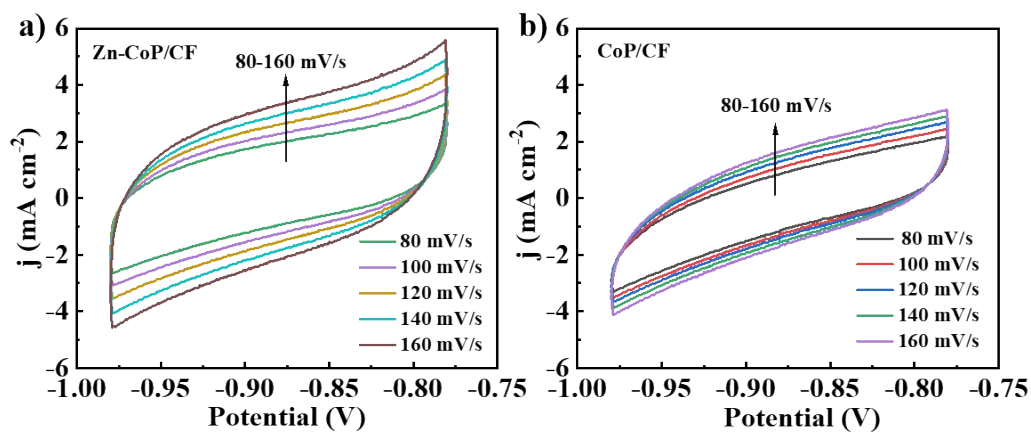

**Fig. S8** For HER: CV curves of (a) Zn-CoP/CF and (b) CoP/CF in 1 M KOH solution.

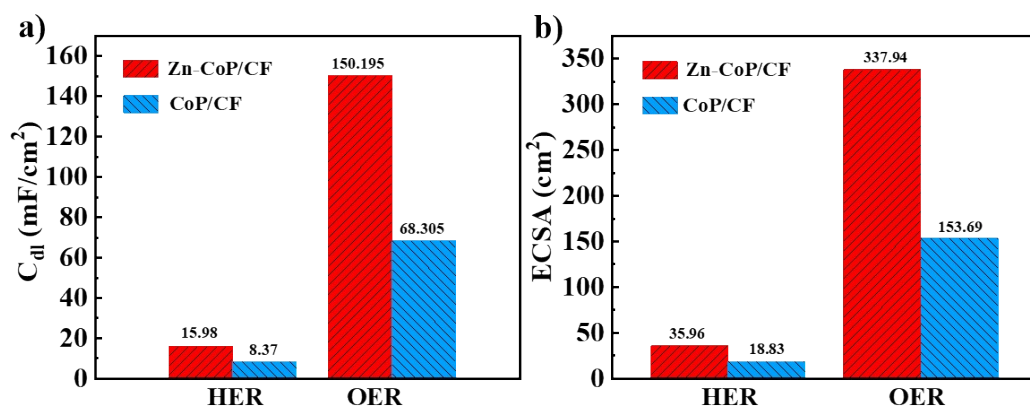

**Fig. S9** For HER and OER: (a)  $C_{dl}$  values and (b) ECSA values of different samples for comparison.  $C_{dl}$  is 1/2 of the slope of capacitive current density vs. scan rate in linear plots.

According to the previously reported work, the ECSA was calculated based on the values of  $C_{dl}$ .

$$\text{ECSA} = \frac{C_{dl}}{C_s}$$

The specific capacitance ( $C_s$ ) is used as  $40 \mu\text{F}/\text{cm}^2$  as reported in 1 M KOH. In our work,  $C_{dl}$  is multiplied by the geometric area of the electrode first.

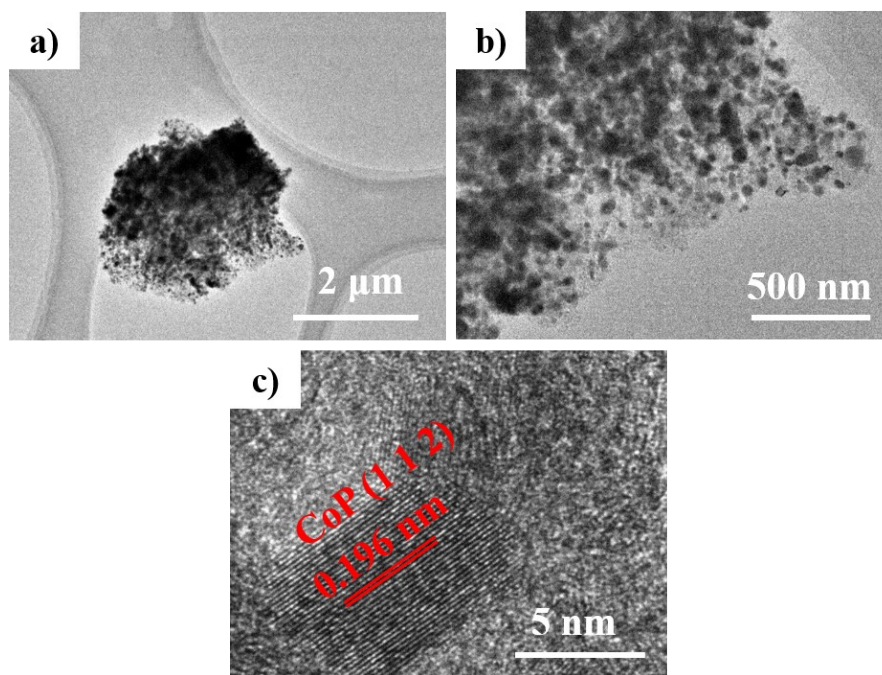

**Fig. S10** (a-b) TEM images and (c) high-resolution TEM image of Zn-CoP/CF after HER stability test.

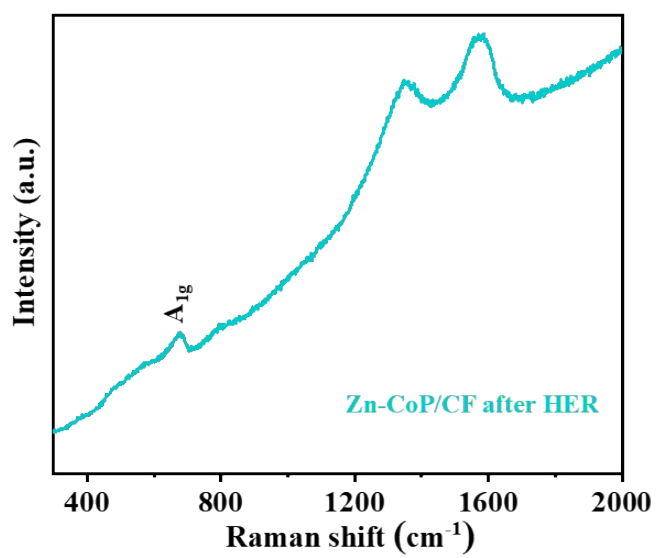

**Fig. S11** Raman spectra of Zn-CoP/CF after HER stability test.

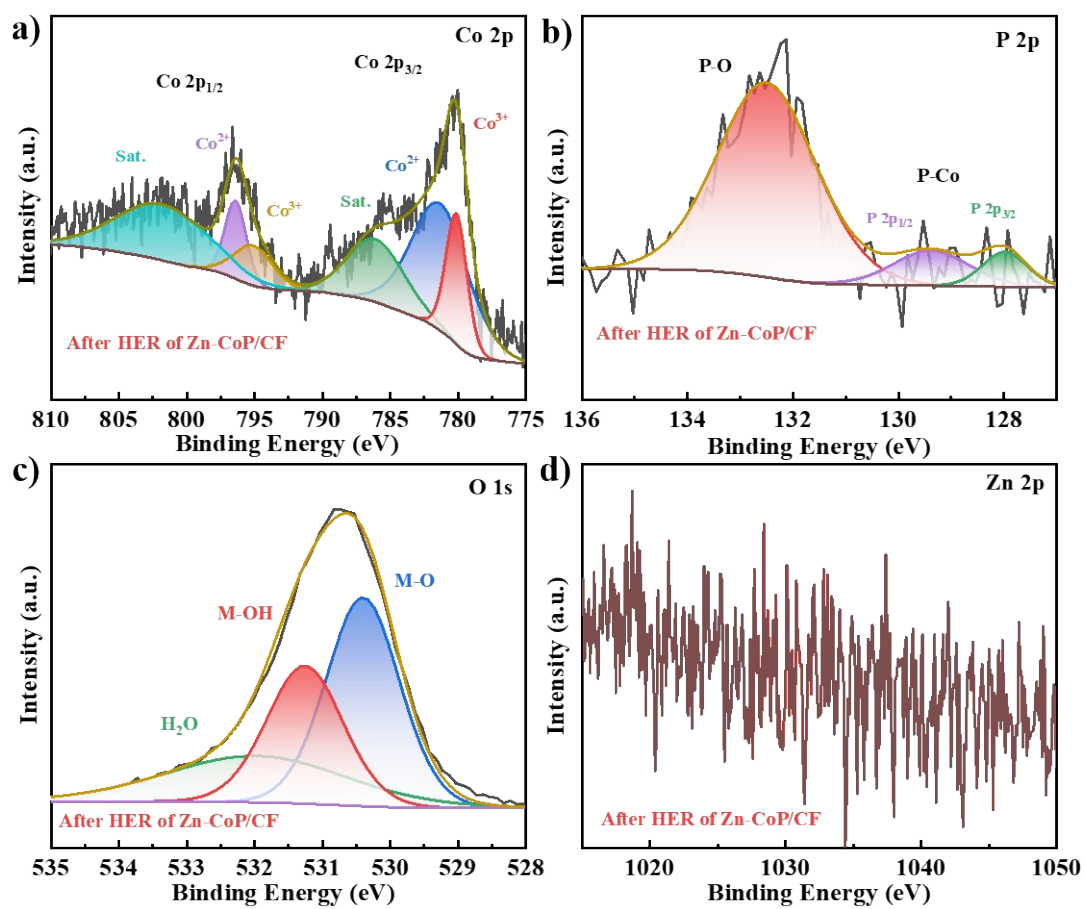

**Fig. S12** XPS spectrum of Zn-CoP/CF after HER electrochemical test: (a) Co 2p; (b) P 2p; (c) O 1s; (d) Zn 2p.

## Zn-doped CoP

a) Top-view:

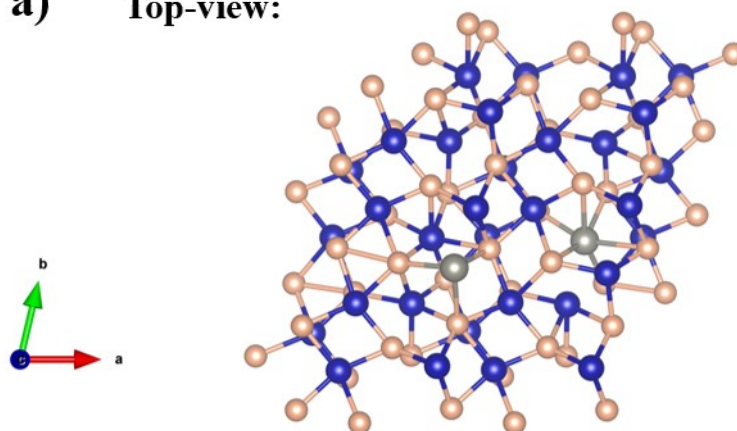

b) Side-view:

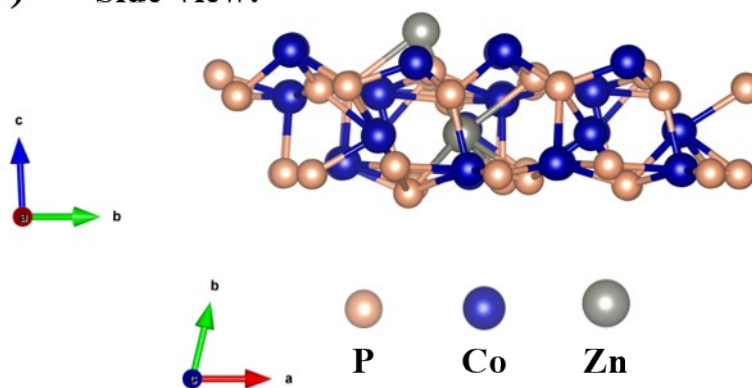

**Fig. S13** (a) Top view and (b) side view of Zn-doped CoP. Orange, blue, and gray balls represent P, Co, and Zn atoms, respectively.

# CoP-H<sub>ads</sub>

a) Top-view:

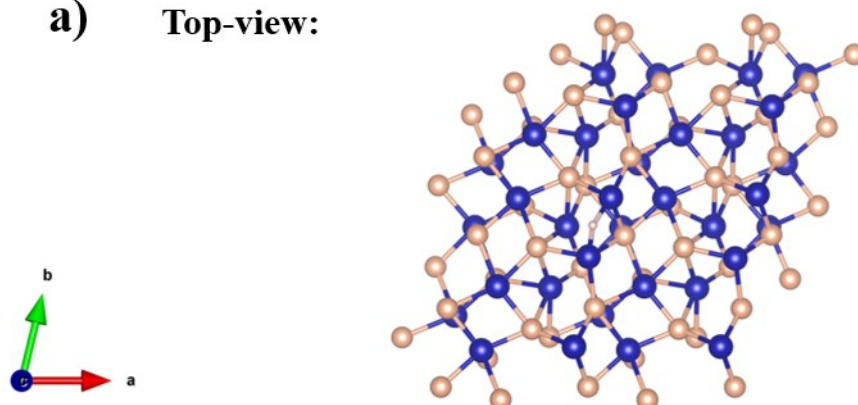

b) Side-view:

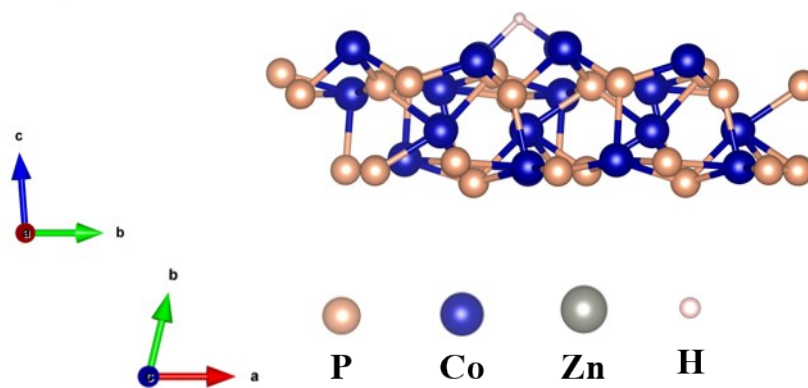

**Fig. S14** (a) Top and (b) side view of optimized models for hydrogen adsorption on CoP (111) surface.

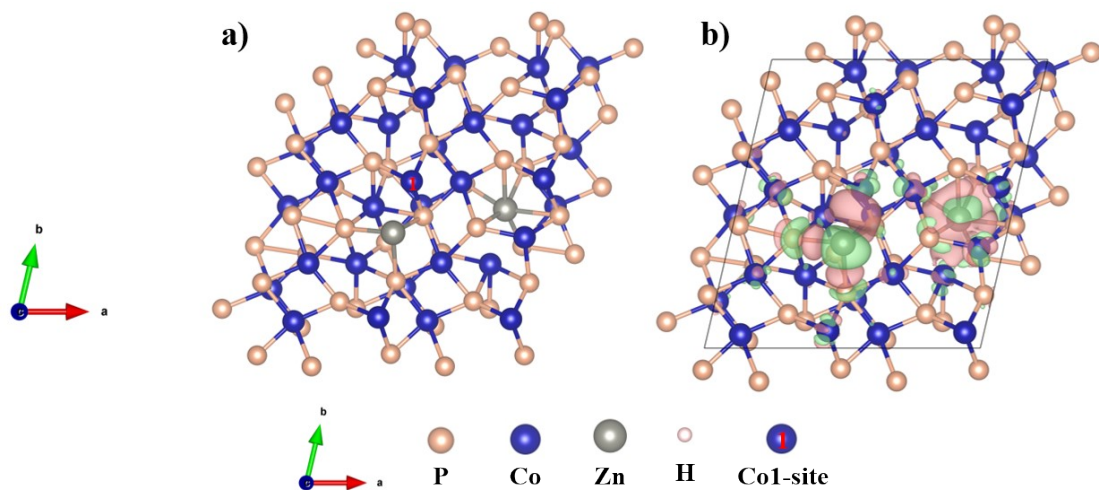

**Fig. S15** (a) Location of Co1-site in the Zn-doped CoP structure. (b) The charge density difference at the Zn-doped CoP with an isosurface value of  $0.002 \text{ e } \text{\AA}^{-3}$ . Green and pink colors represent charge depletion and accumulation, respectively.



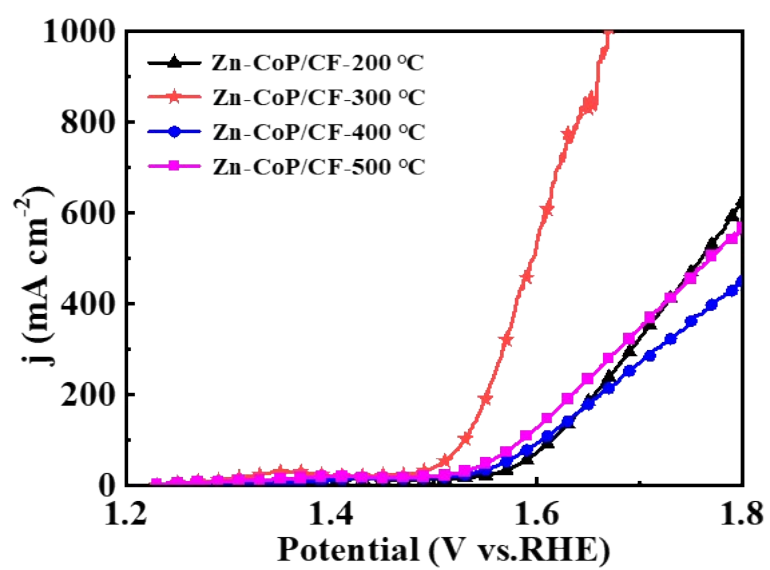

**Fig. S16** Polarization curves for OER of catalysts at different phosphating temperatures.

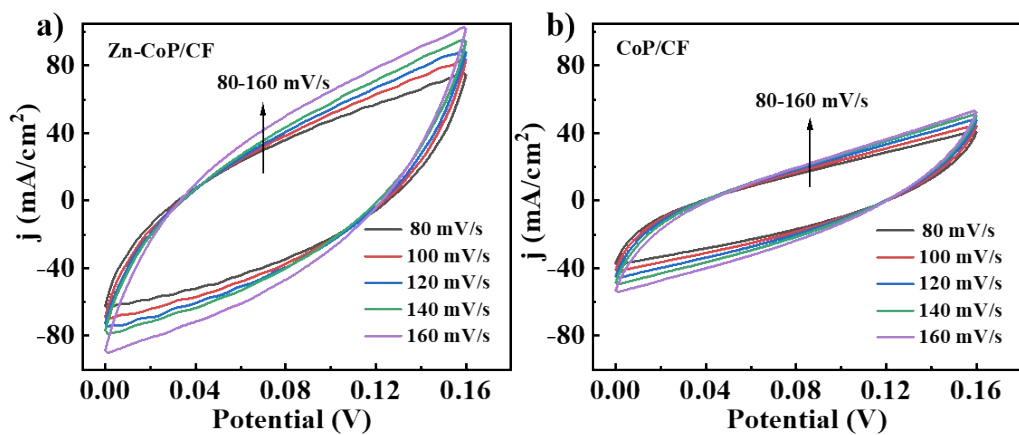

**Fig. S17** For OER: CV curves of (a) Zn-CoP/CF and (b) CoP/CF in 1 M KOH solution.

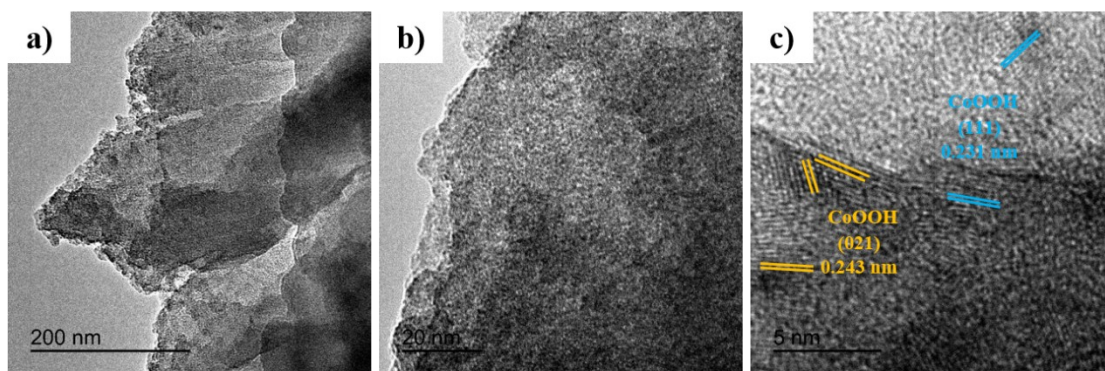

**Fig. S18** (a-b) TEM images and (c) high-resolution TEM image of Zn-CoP/CF after OER stability test.

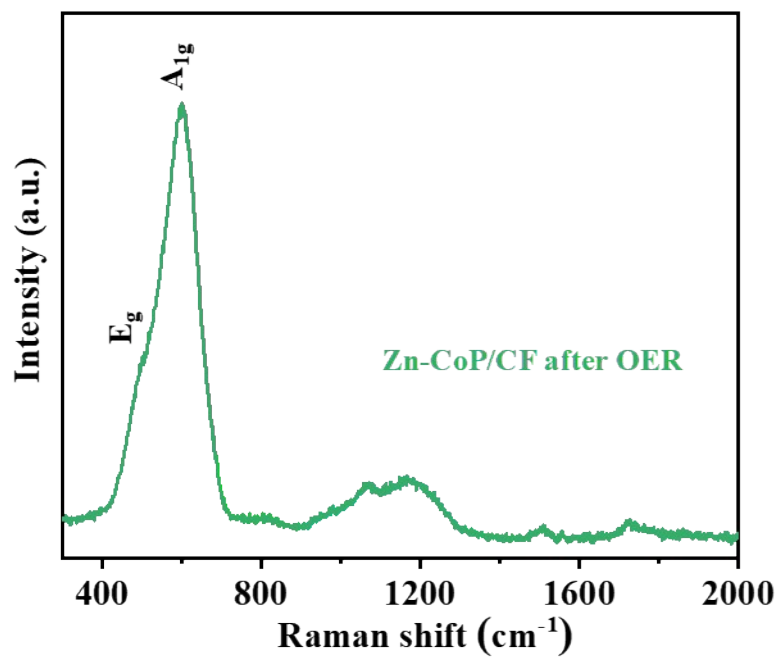

Fig. S19 Raman spectra of Zn-CoP/CF after OER stability test.

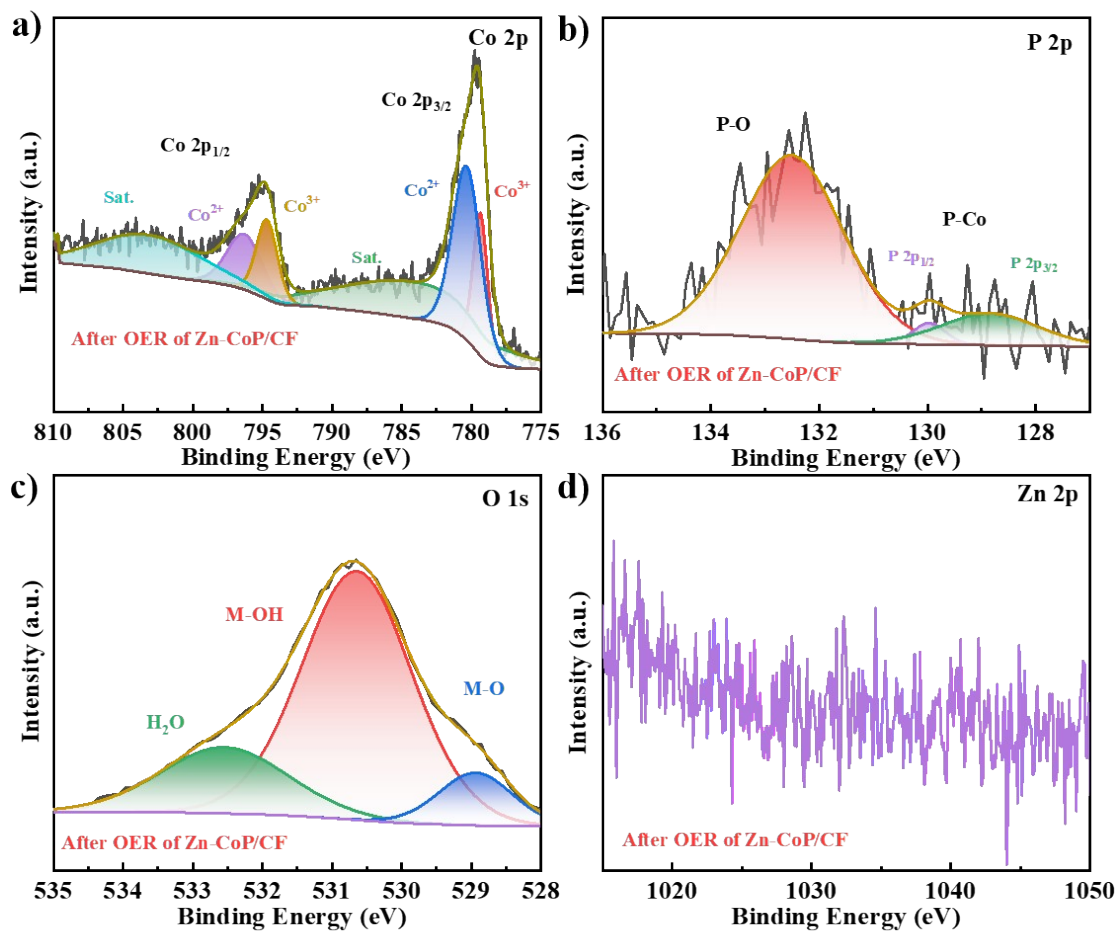

**Fig. S20** XPS spectrum of Zn-CoP/CF after OER electrochemical test: (a) Co 2p; (b) P 2p; (c) O 1s; (d) Zn 2p.

**Table S1.** Fitted data from Nyquist plots of as-synthesized samples in alkaline conditions.

| Catalysts | Electrolyte | HER         |                | OER         |                |
|-----------|-------------|-------------|----------------|-------------|----------------|
|           |             | $R_s$ (ohm) | $R_{ct}$ (ohm) | $R_s$ (ohm) | $R_{ct}$ (ohm) |
| Zn-CoP/CF | 1 M KOH     | 3.596       | 231.1          | 3.543       | 21.81          |
| CoP/CF    | 1 M KOH     | 3.557       | 312.8          | 3.879       | 77.72          |

**Table S2.** The recently reported Co-based bifunctional electrocatalysts for HER and OER in alkaline media.

| Catalysts                              | Electrolyt<br>e | HER                        |                       | OER                        |                       | References                                                 |
|----------------------------------------|-----------------|----------------------------|-----------------------|----------------------------|-----------------------|------------------------------------------------------------|
|                                        |                 | j<br>(mA/cm <sup>2</sup> ) | Overpotential<br>(mV) | j<br>(mA/cm <sup>2</sup> ) | Overpotential<br>(mV) |                                                            |
| Zn-CoP/CF                              | 1 M KOH         | 100                        | 166                   | 100                        | 300                   | This work                                                  |
|                                        |                 | 500                        | 255                   | 500                        | 367                   |                                                            |
|                                        |                 | 1000                       | 327                   | 1000                       | 440                   |                                                            |
| Fe-CoP HNSs                            | 1 M KOH         | 10                         | 79                    | 10                         | 220                   | Int. J. Hydrogen Energy, <b>2021</b> , 46(52), 26391-26401 |
| Cr-CoP/CP                              | 1 M KOH         | 10                         | 67                    | 10                         | 251                   | Chem. Eng. J., <b>2021</b> , 425, 130651                   |
| V-CoP@a-CeO <sub>2</sub>               | 1 M KOH         | 100                        | 140                   | 100                        | 340                   | Adv. Funct. Mater. <b>2020</b> , 30(14), 1909618           |
| CoFeP/CF                               | 1 M KOH         | 50                         | 152.6                 | 50                         | 277.9                 | J. Colloid Interface Sci., <b>2020</b> , 569, 140-149      |
| CoP/SPNF                               | 1 M KOH         | 100                        | 160                   | 100                        | 266                   | Inorg. Chem. <b>2020</b> 59 (12), 8522-8531                |
| Fe <sub>3</sub> Co <sub>7</sub> @PCNSs | 1 M KOH         | 10                         | 205                   | 10                         | 300                   | J. Colloid Interface Sci., <b>2019</b> , 537, 280-294      |
| CoNi-OOH-30(40)                        | 1 M KOH         | 10                         | 210                   | 10                         | 279                   | Electrochim. Acta, <b>2019</b> , 301, 449-457              |
| Fe-CoP HTPs/NF                         | 1 M KOH         | 10                         | 98                    | 10                         | 230                   | Small <b>2018</b> , 14 (14),                               |

|                 |         |     |     |     |     |                                                     |
|-----------------|---------|-----|-----|-----|-----|-----------------------------------------------------|
|                 |         |     |     |     |     | 1704233                                             |
| Ni-Co-S/Ni-Co-P | 1 M KOH | 20  | 110 | 50  | 240 | J. Mater. Chem. A <b>2018</b> , 6 (41), 20297-20303 |
| NiCoP NWAs/NF   | 1 M KOH | 100 | 197 | 100 | 370 | J. Mater. Chem. A <b>2017</b> , 5 (28), 14828-14837 |



**Table S3.** The recently reported Co-based bifunctional electrocatalysts for overall water splitting in alkaline media.

| Catalysts                              | Electrolyte | Overall water splitting     |                   | References                                                 |
|----------------------------------------|-------------|-----------------------------|-------------------|------------------------------------------------------------|
|                                        |             | j<br>(mA cm <sup>-2</sup> ) | Potential<br>(mV) |                                                            |
| Zn-CoP/CF                              | 1 M KOH     | 100                         | 1.71              | This work                                                  |
|                                        |             | 1000                        | 2.01              |                                                            |
| Fe-CoP HNSs                            | 1 M KOH     | 20                          | 1.60              | Int. J. Hydrogen Energy, <b>2021</b> , 46(52), 26391-26401 |
| Cr-CoP/CP                              | 1 M KOH     | 100                         | 1.73              | Chem. Eng. J., <b>2021</b> , 425, 130651                   |
| V-CoP@a-CeO <sub>2</sub>               | 1 M KOH     | 100                         | 1.71              | Adv. Funct. Mater. <b>2020</b> , 30(14), 1909618           |
| CoFeP/CF                               | 1 M KOH     | 10                          | 1.495             | J. Colloid Interface Sci., <b>2020</b> , 569, 140-149      |
| CoP/SPNF                               | 1 M KOH     | 50                          | 1.621             | Inorg. Chem., <b>2020</b> , 59 (12), 8522-8531             |
| Fe <sub>3</sub> Co <sub>7</sub> @PCNSs | 1 M KOH     | 100                         | 1.794             | J. Colloid Interface Sci., <b>2019</b> , 537, 280-294      |
| CoNi-OOH-30(40)                        | 1 M KOH     | 10                          | 1.76              | Electrochim. Acta, <b>2019</b> , 301, 449-457              |
| Fe-CoP HTPs/NF                         | 1 M KOH     | 10                          | 1.59              | Small, <b>2018</b> , 14 (14), 1704233                      |
| NiCoP NWAs/NF                          | 1 M KOH     | 20                          | 1.64              | J. Mater. Chem. A, <b>2017</b> , 5 (28), 14828-14837       |
